# Supplementary material
Source: PubMed Central journal article supplement (PMC1691752)

These are electronic appendices to the paper by Rayfield 2004 Cranial mechanics and feeding in *Tyrannosaurus rex*. *Proc. R. Soc. Lond. B* **271**, 1451–1459. (DOI 10.1098/rspb.2004.2755.)

Electronic appendices are refereed with the text. However, no attempt is made to impose a uniform editorial style on the electronic appendices.

**Electronic Appendix A.** Stress patterns and orientation in a *T. rex* FE skull model with a mobile maxilla-jugal and mobile postorbital-jugal suture, generated by vertical biting (left column) or tearing (right column): (a) principal stress 3 [P3], compressive stress; (b) P1 tensile stress; (c) shear stress; (d) P3 compressive stress; (e) P1 tensile stress; (f) shear stress. Divergent arrows indicate orientation of tensile stress trajectories; convergent arrows indicate orientation of compressive stress trajectories. Units are Pascals ( $Pa$ )/  $Nm^{-2}$ .

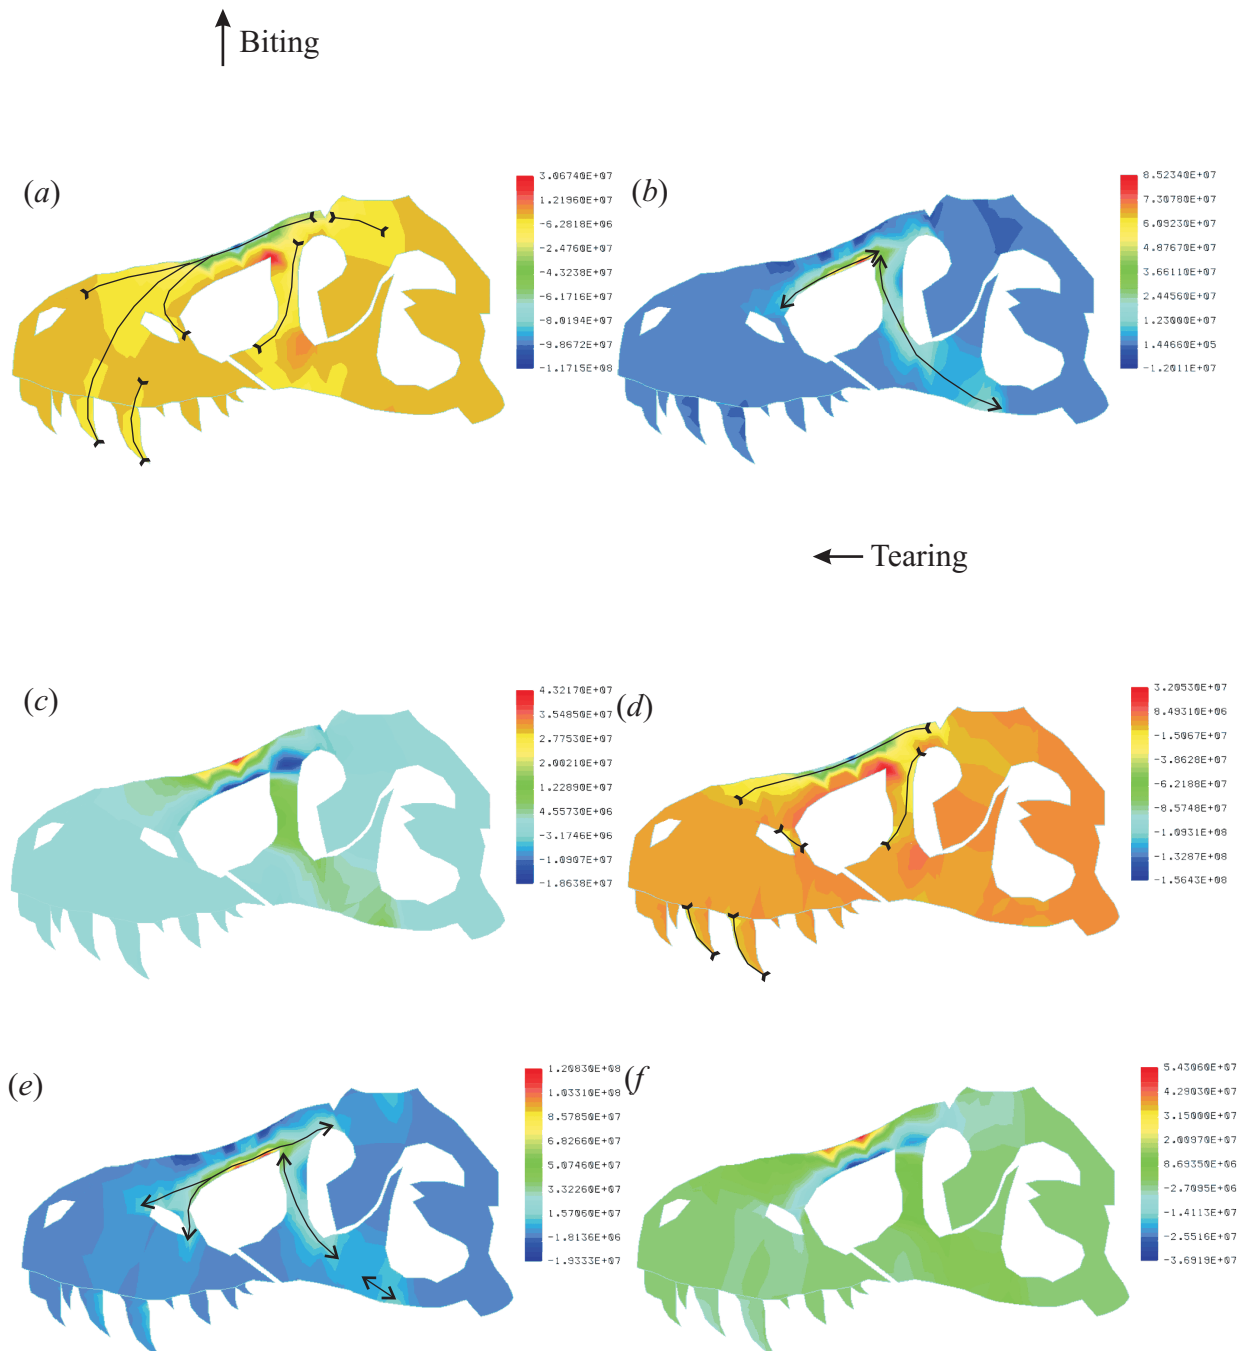

**Electronic Appendix B.** Shear stress in *T. rex* FE skull models: (a) shear stress during biting with a mobile postorbital-jugal suture; (b) shear stress during biting with a mobile maxilla-jugal suture; (c) shear stress during tearing with a mobile postorbital-jugal suture; (d) shear stress during tearing with a mobile maxilla-jugal suture. Units are Pascals ( $Pa$ ) /  $Nm^{-2}$ .

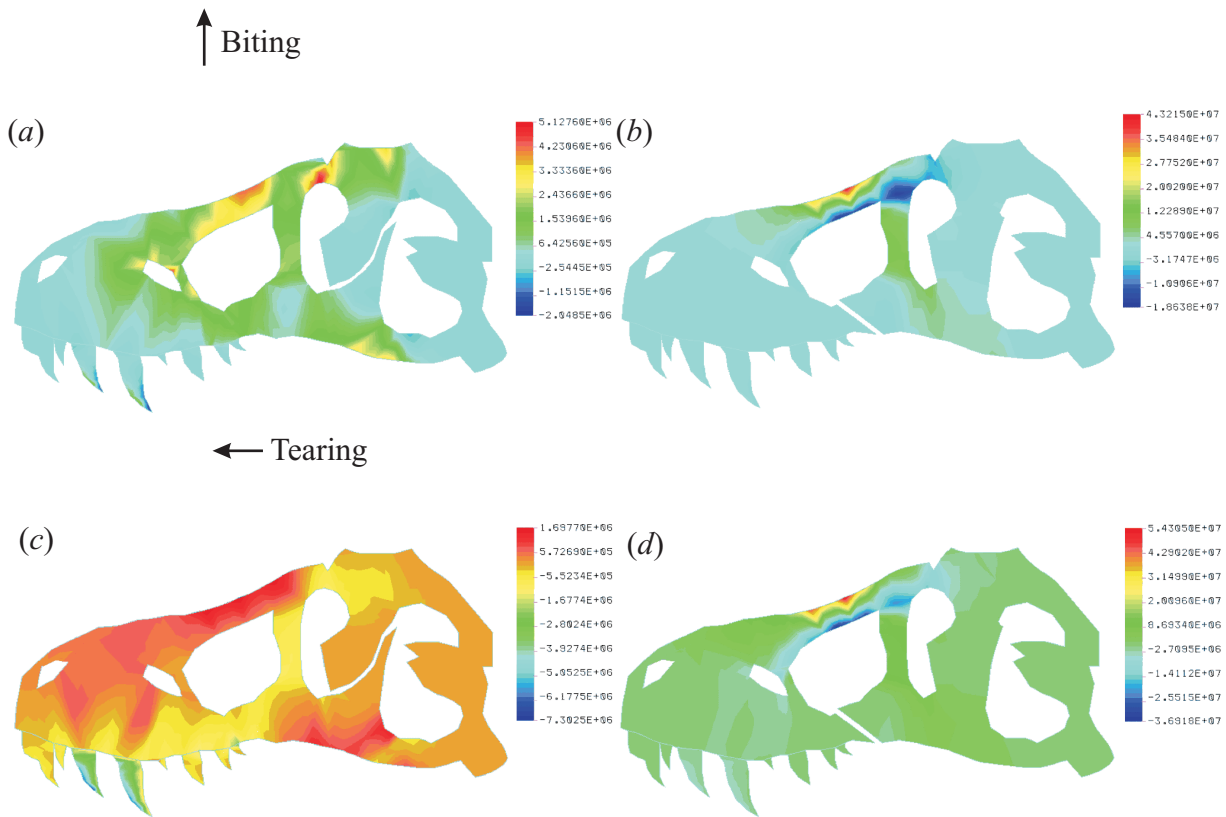

**Electronic Appendix C.** Strain in *T. rex* FE skull models: (a – f) fused skull model; (a) horizontal (X-direction) strain during biting; (b) vertical (Y-direction) strain during biting; (c) shear strain during biting; (d) horizontal strain during tearing; (e) vertical strain during tearing; (f) shear strain during tearing; (g – l) mobile postorbital-jugal suture model; (g) horizontal strain during biting; (h) vertical strain during biting; (i) shear strain during biting; (j) horizontal strain during tearing; (k) vertical strain during tearing; (l) shear strain during tearing; (m – r) mobile maxilla-jugal suture model; (m) horizontal strain during biting; (n) vertical strain during biting; (o) shear strain during biting; (p) horizontal strain during tearing; (q) vertical strain during tearing; (r) shear strain during tearing; (s – x) mobile maxilla-jugal and postorbital-jugal suture model; (s) horizontal strain during biting; (t) vertical strain during biting; (u) shear strain during biting; (v) horizontal strain during tearing; (w) vertical strain during tearing; (x) shear strain during tearing. Units are microstrain ( $\mu\epsilon$ ).

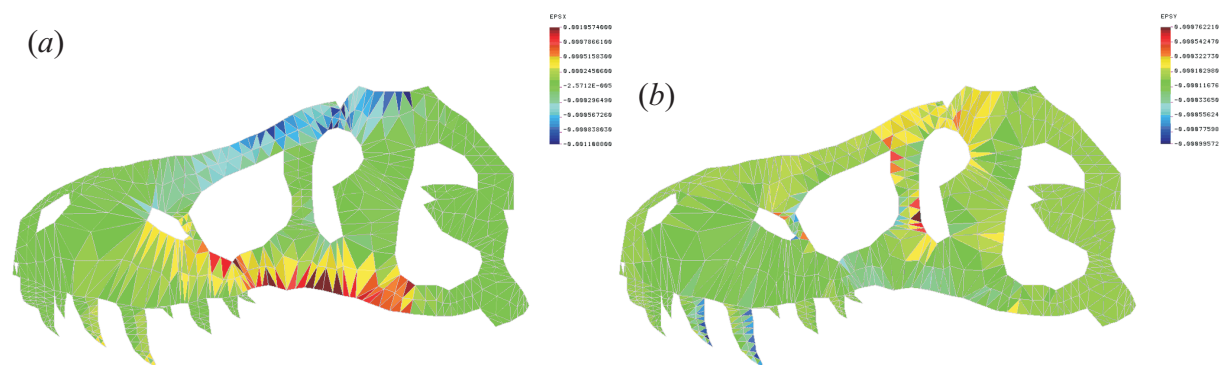

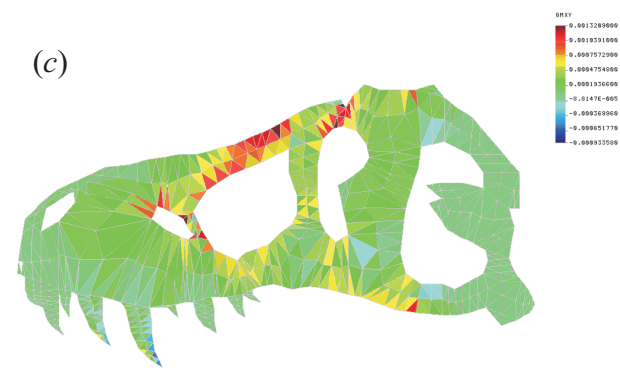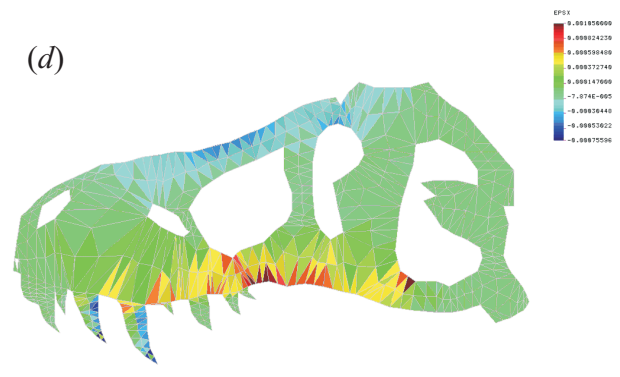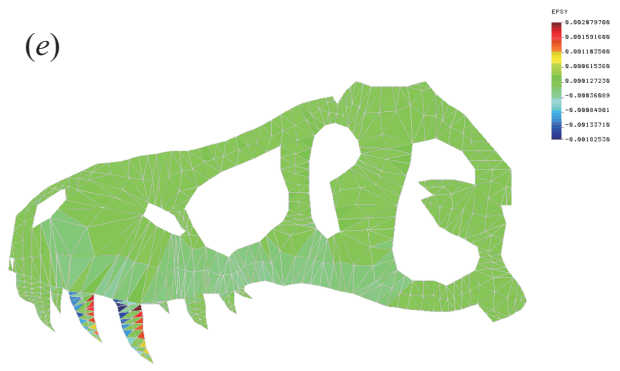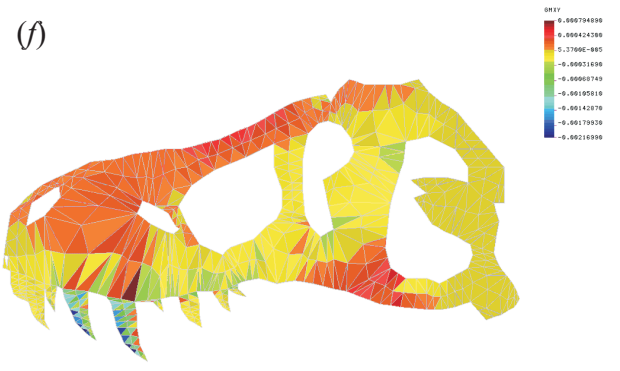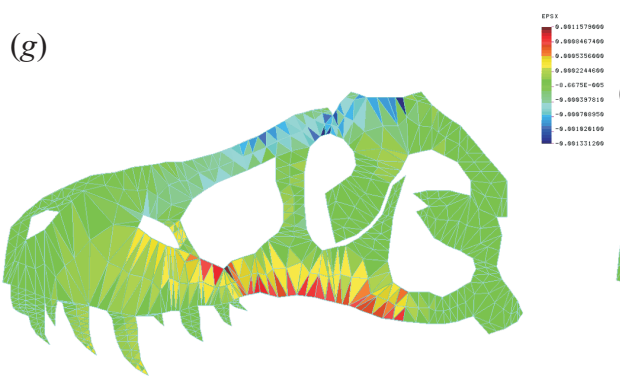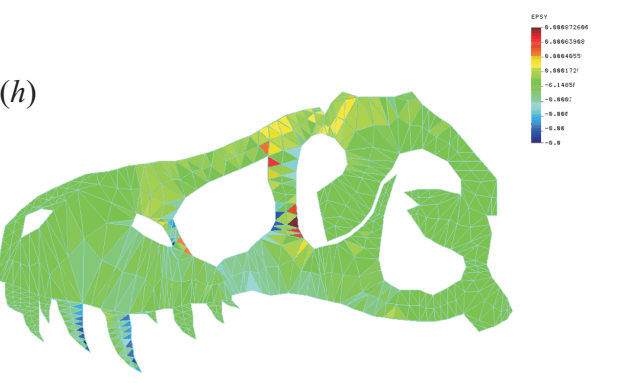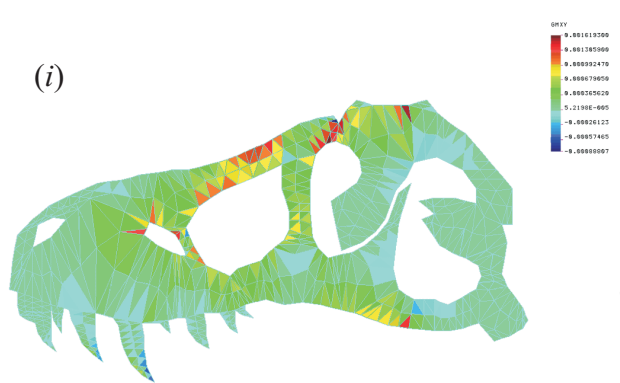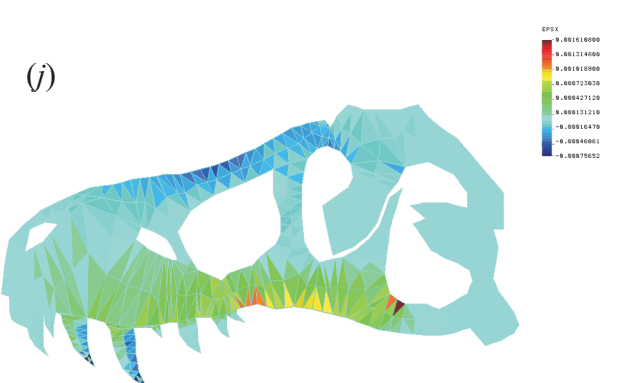

(k)

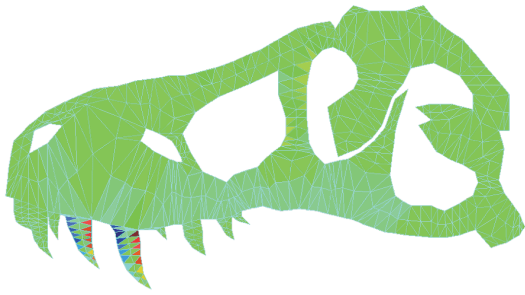

(l)

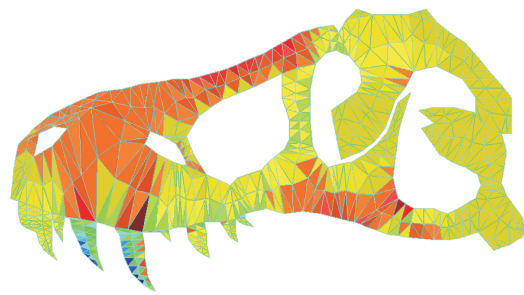

(m)

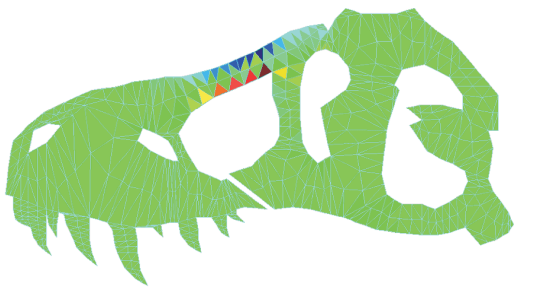

(n)

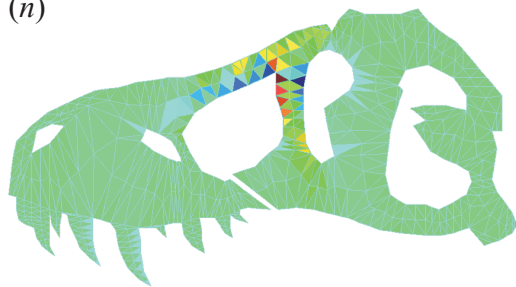

(o)

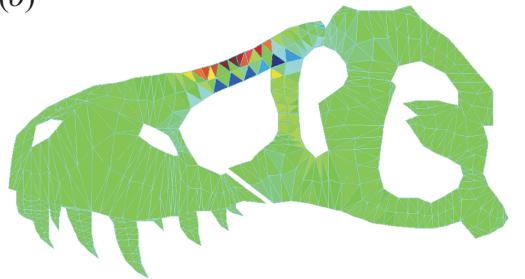

(p)

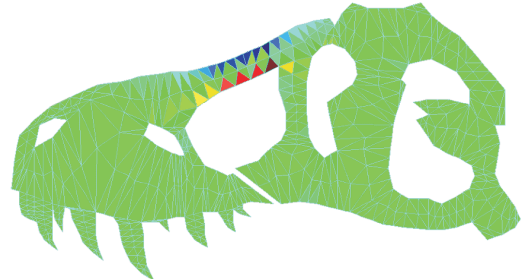

(q)

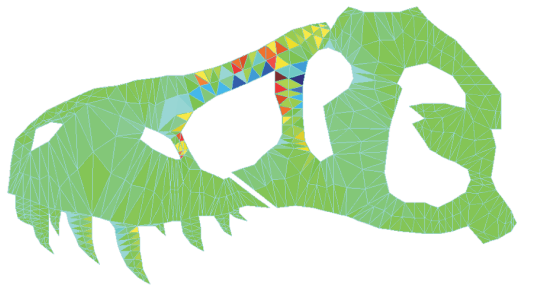

(r)

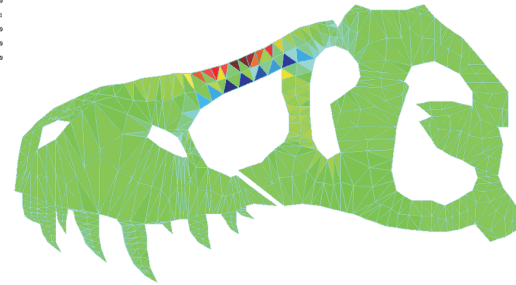

(s)

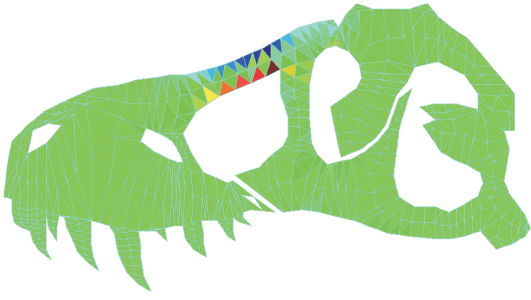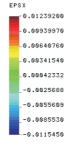

(t)

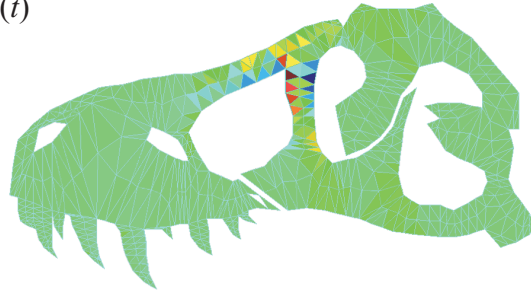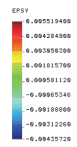

(u)

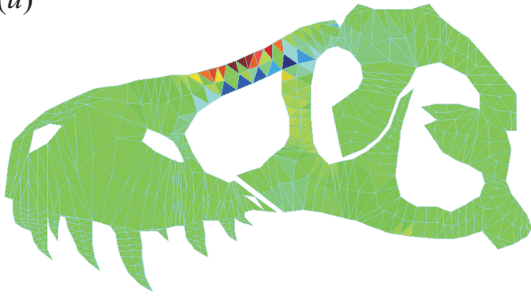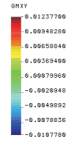

(v)

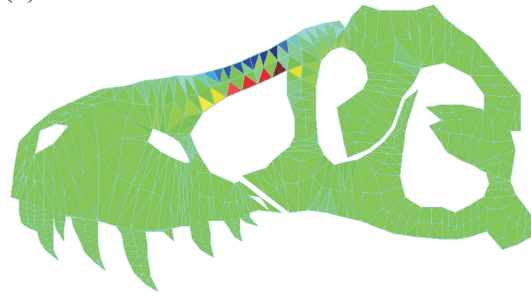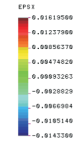

(w)

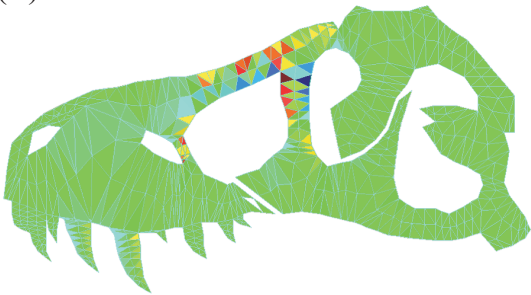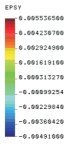

(x)

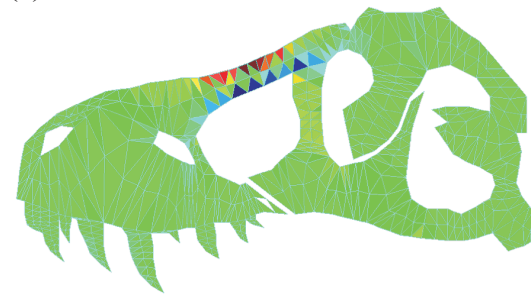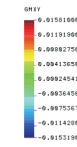

Supplement: 15306316s01.pdf [file 15306316s01.pdf]
